# Supplementary material for: DNA methylation age is elevated in breast tissue of healthy women
Source: Springer Nature journal article supplement (doi:10.1007/s10549-017-4218-4), 2017-03-31

### Breast

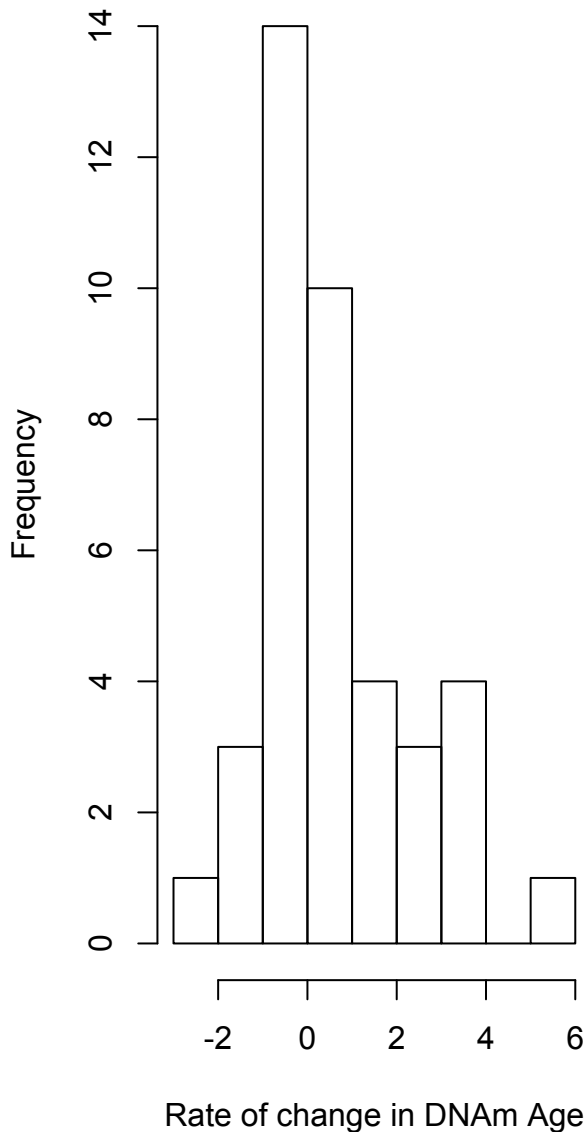

### Blood

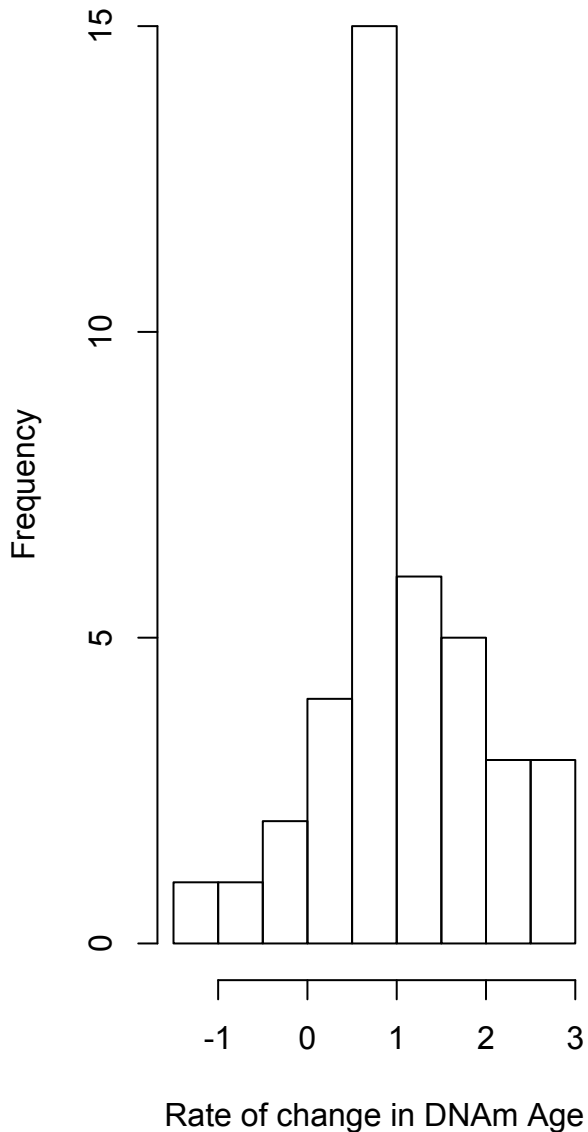

Supplement: MOESM1 [file 12191880]
